# Supplementary material for: Neuroticism and conscientiousness respectively constrain and facilitate short‐term plasticity within the working memory neural network
Source: PubMed Central journal article supplement — Hum Brain Mapp. 2015 Jul 20;36(10):4158–63. doi: 10.1002/hbm.22906 (PMC4863074; doi:10.1002/hbm.22906), 2015-07-20
Supplement: NIHMS779944-supplement-Supplemental.pdf [file NIHMS779944-supplement-Supplemental.pdf]

**Supplemental Table S1. Voxel-based whole brain SPM analysis: brain regions showing significant main effects in terms of hemodynamic responses to different working memory loads; 1, 2, and 3 back (P < 0.05, FWE cluster-level corrected across the whole brain with minimum cluster size 20 voxels)**

| Brain region                                                                                                                                                                                                                                                                                                                                       | BA | Laterality | Coordinates |     |    | Cluster size (voxels) | Z value |
|----------------------------------------------------------------------------------------------------------------------------------------------------------------------------------------------------------------------------------------------------------------------------------------------------------------------------------------------------|----|------------|-------------|-----|----|-----------------------|---------|
|                                                                                                                                                                                                                                                                                                                                                    |    |            | x           | y   | z  |                       |         |
| <b>1 back&gt;0 back</b>                                                                                                                                                                                                                                                                                                                            |    |            |             |     |    |                       |         |
| Inferior parietal lobule                                                                                                                                                                                                                                                                                                                           | 40 | R          | 46          | -46 | 44 | 121                   | 6.61    |
|                                                                                                                                                                                                                                                                                                                                                    |    | L          | -44         | -42 | 38 | 754                   | 6.31    |
| Middle frontal gyrus                                                                                                                                                                                                                                                                                                                               | 46 | L          | -46         | 32  | 30 | 153                   | 6.42    |
|                                                                                                                                                                                                                                                                                                                                                    |    | R          | 52          | 36  | 30 | 256                   | 6.30    |
| Middle frontal gyrus                                                                                                                                                                                                                                                                                                                               | 6  | R          | 32          | 6   | 62 | 47                    | 5.97    |
| <b>2 back&gt;0 back</b>                                                                                                                                                                                                                                                                                                                            |    |            |             |     |    |                       |         |
| Inferior parietal lobule                                                                                                                                                                                                                                                                                                                           | 40 | R          | 40          | -48 | 44 | 231                   | 7.90    |
|                                                                                                                                                                                                                                                                                                                                                    |    | L          | -36         | -52 | 46 | 190                   | 7.75    |
| Middle frontal gyrus                                                                                                                                                                                                                                                                                                                               | 46 | R          | 46          | 32  | 28 | 544                   | 7.03    |
|                                                                                                                                                                                                                                                                                                                                                    | 9  | L          | -42         | 8   | 28 | 968                   | 6.64    |
| Anterior cingulate gyrus                                                                                                                                                                                                                                                                                                                           | 32 | R          | 8           | 18  | 48 | 354                   | 6.88    |
|                                                                                                                                                                                                                                                                                                                                                    |    | L          | -4          | 10  | 58 |                       |         |
| Insula                                                                                                                                                                                                                                                                                                                                             | 13 | R          | 34          | 24  | -2 | 151                   | 6.47    |
| Middle frontal gyrus                                                                                                                                                                                                                                                                                                                               | 6  | R          | 30          | 8   | 58 | 414                   | 6.12    |
| <b>3 back&gt;0 back</b>                                                                                                                                                                                                                                                                                                                            |    |            |             |     |    |                       |         |
| Inferior parietal lobule                                                                                                                                                                                                                                                                                                                           | 40 | R          | 50          | -42 | 42 | 287                   | 8.01    |
|                                                                                                                                                                                                                                                                                                                                                    |    | L          | -48         | -48 | 48 | 263                   | 7.98    |
| Middle frontal gyrus                                                                                                                                                                                                                                                                                                                               | 9  | L          | -48         | 26  | 30 | 800                   | 8       |
|                                                                                                                                                                                                                                                                                                                                                    | 46 | R          | 48          | 40  | 30 | 542                   | 7.99    |
| Anterior cingulate gyrus                                                                                                                                                                                                                                                                                                                           | 32 | L          | -10         | 26  | 30 | 333                   | 7.53    |
|                                                                                                                                                                                                                                                                                                                                                    |    | R          | 8           | 20  | 28 |                       |         |
| Insula                                                                                                                                                                                                                                                                                                                                             | 13 | L          | -34         | 22  | 0  | 680                   | 6.99    |
| Thalamus                                                                                                                                                                                                                                                                                                                                           | -  | L          | -12         | -10 | 6  | 142                   | 6.44    |
| Inferior frontal gyrus                                                                                                                                                                                                                                                                                                                             | 10 | L          | -44         | 46  | 2  | 319                   | 5.98    |
|                                                                                                                                                                                                                                                                                                                                                    | 47 | R          | 34          | 20  | 0  | 572                   | 5.67    |
| MNI coordinates denote the distance in mm from the anterior commissure, with positive x=right of midline, positive y=anterior to the anterior commissure, and positive z=dorsal to a plane containing both the anterior and the posterior commissures; BA=Brodman area; L=left; R=right; FWE=Familywise Error; SPM, Statistical Parametric Mapping |    |            |             |     |    |                       |         |

## Relationship of NEO-PI domain scores to effective connectivity in the 2-back experimental condition

Image processing, conventional fMRI analysis, volume of interest selection and model specification proceeded as described in the main manuscript. In the section to follow, model comparison and all subsequent analyses are restricted to the 2-back vs. 0-back condition that is often used in clinical populations.

As we have already shown (Dima et al., 2014), Bayesian Model Selection (BMS; Stephan et al., 2009) within the 2-back experimental condition identified two acceptable models. The winning model was the same as in the 3-back condition, with WM modulation being significant for the forward connection from the right PAR to the right DLPFC. However, the exceedance probability of this model in the 2-back condition was 60%. The second best fitting model, with exceedance probability of 40%, differed from the winning model only in terms of laterality as the WM modulation was significant for the forward connection from the left PAR to the left DLPFC. We then used random effects Bayesian Model Averaging (BMA) to obtain average connectivity estimates across all models for each participant (Penny et al., 2010) as BMA accommodates uncertainty about models when estimating the consistency and strength of connections

We conducted two regression analyses, one for each of the two best fitting models. In the first regression analysis, we used the BMA connectivity estimates of the forward connection from the right PAR to the right DLPFC of the winning model as a dependent variable in a forced regression model with age, sex, IQ and NEO-PI scores of all five personality domains as factors. This analysis showed that higher neuroticism scores were associated with reduced WM modulation of the connection from the right PAR to the right DLPFC ( $\beta=-0.77$ ,  $p<0.001$ ), while the opposite was the case for conscientiousness ( $\beta=0.84$ ,  $p < 0.001$ ). Agreeableness ( $\beta=-0.10$ ,  $p>0.3$ ), Extraversion ( $\beta=0.11$ ,  $p>0.3$ ), Openness to Experience ( $\beta=0.15$ ,  $p>0.3$ ), age ( $\beta=-0.09$ ,  $p>0.3$ ), sex ( $\beta=-0.12$ ,  $p>0.3$ ), and IQ ( $\beta=0.13$ ,  $p>0.3$ ), were not significant. The overall model fit was  $R^2 = 0.44$ .

In the second regression analysis, we used the BMA connectivity estimates of the forward connection from the left PAR to the left DLPFC of the second-best model as a dependent variable in a forced regression model with age, sex, IQ and NEO-PI scores of all five personality domains as factors. Again we found that higher neuroticism scores were associated with reduced WM modulation of the connection from the left PAR to the left DLPFC ( $\beta=-0.89$ ,  $p=0.001$ ), while the opposite was the case for conscientiousness ( $\beta=0.71$ ,  $p = 0.001$ ). Agreeableness ( $\beta=-0.01$ ,  $p>0.2$ ), Extraversion ( $\beta=0.02$ ,  $p>0.2$ ), Openness to Experience ( $\beta=0.17$ ,  $p>0.2$ ), age ( $\beta=-0.01$ ,  $p>0.2$ ), sex ( $\beta=-0.26$ ,  $p>0.2$ ), and IQ ( $\beta=0.03$ ,  $p>0.2$ ), were not significant. The overall model fit was  $R^2 = 0.40$ .

## References

- Dima, D., Jogia, J., Frangou, S. (2014). Dynamic Causal Modeling of load-dependent modulation of effective connectivity within the verbal working memory network. *Human Brain Mapping*, 35, 3025-3035.
- Penny, W. D., Stephan, K. E., Daunizeau, J., Rosa, M. J., Friston, K. J., Schofield, T. M., Leff A.P. (2010). Comparing Families of Dynamic Causal Models. *PLoS Computational Biology*, 6, doi: 10.1371/journal.pcbi.1000709.
- Stephan, K. E., Penny, W. D., Daunizeau, J., Moran, R. J., Friston, K. J. (2009). Bayesian Model Selection for Group Studies. *Neuroimage*, 46, 1004-1017.
